# Supplementary material for: Characterization of the Small RNA Transcriptome of the Marine Coccolithophorid, Emiliania huxleyi
Source: PLOS journal article supplement (doi:10.1371/journal.pone.0154279), 2016-04-21
Supplement: S7 (10.1371/journal.pone.0154279.s007) [file journal.pone.0154279.s007]

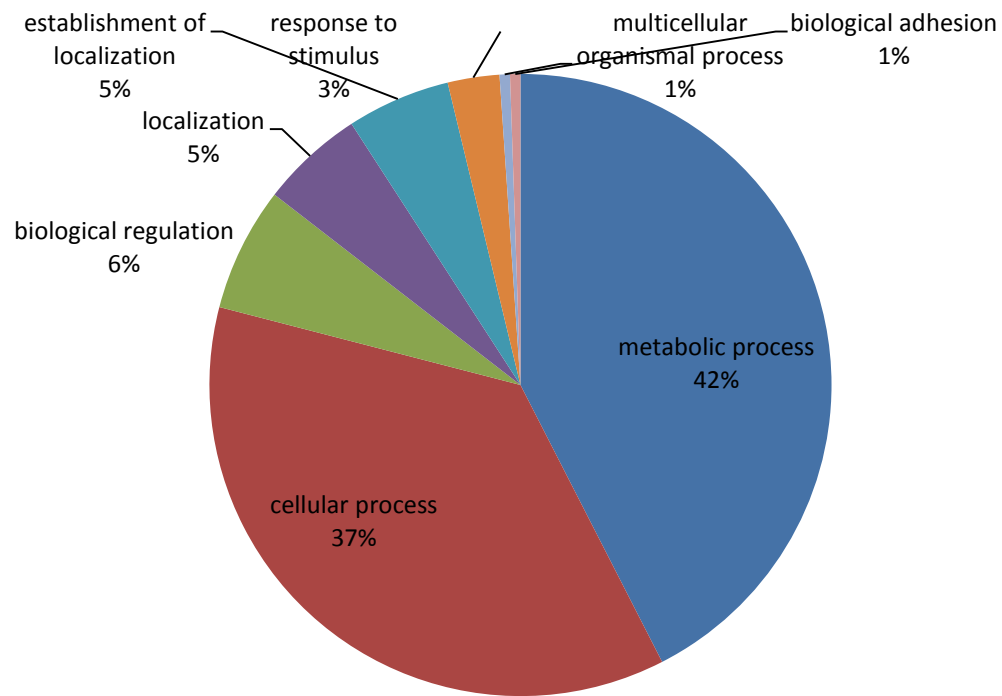

**S7 Fig. Distribution of 2nd level Gene Ontology terms in Biological Process for ta-siRNA targets.**
